# Supplementary material for: One-step formation of a double Pickering emulsion via modulation of the oil phase composition
Source: Royal Society of Chemistry journal article supplement (doi:10.1039/c8fo00937f), 2018-01-01
Supplement: c8fo00937f1.pdf [file c8fo00937f1.pdf]

### Support information

Figure 1. (A) Reverse-phase HPLC pattern of corn peptide fraction from C18-HPLC column. Mass spectrum of the corn peptide. (B): mass spectrum of the fraction appeared at peak 1 (1.08 min); (C): mass spectrum of the fraction appeared at peak 2 (2.34 min).

A

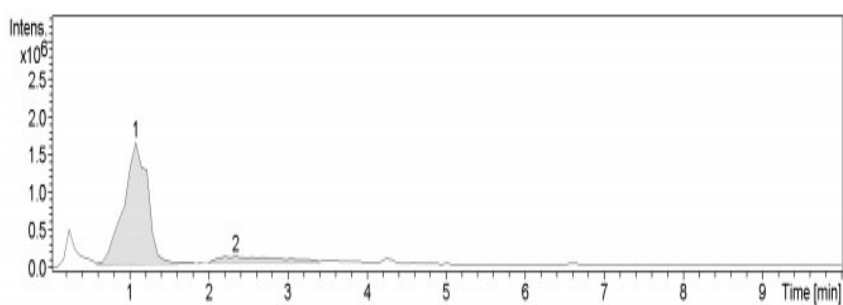

B

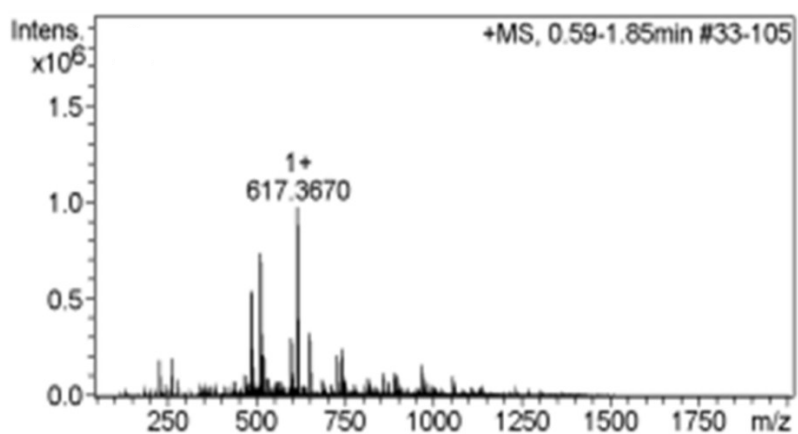

C

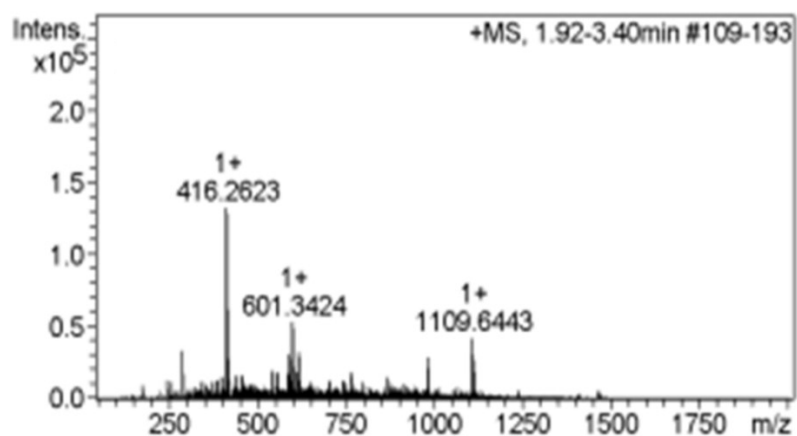

Table 1. The amine acid profile of corn protein peptide (relative content, %)

| Amino Acid | Corn peptide (%) |
|------------|------------------|
| Glu/Gln    | 22.52            |
| Pro        | 13.48            |
| Leu        | 12.86            |
| Asp/Asn    | 7.05             |
| Phe        | 5.35             |
| Ala        | 5.24             |
| Ser        | 4.69             |
| Tyr        | 4.30             |
| Ile        | 3.85             |
| Cys        | 3.74             |
| Val        | 3.56             |
| Arg        | 3.32             |
| Thr        | 3.04             |
| His        | 2.28             |
| Met        | 1.61             |
| Lys        | 0.87             |
